# Supplementary material
Source: HighWire-hosted journal article supplement (https://srh.bmj.com/content/jfprhc-2017-101736)

## Study Procedure Chart

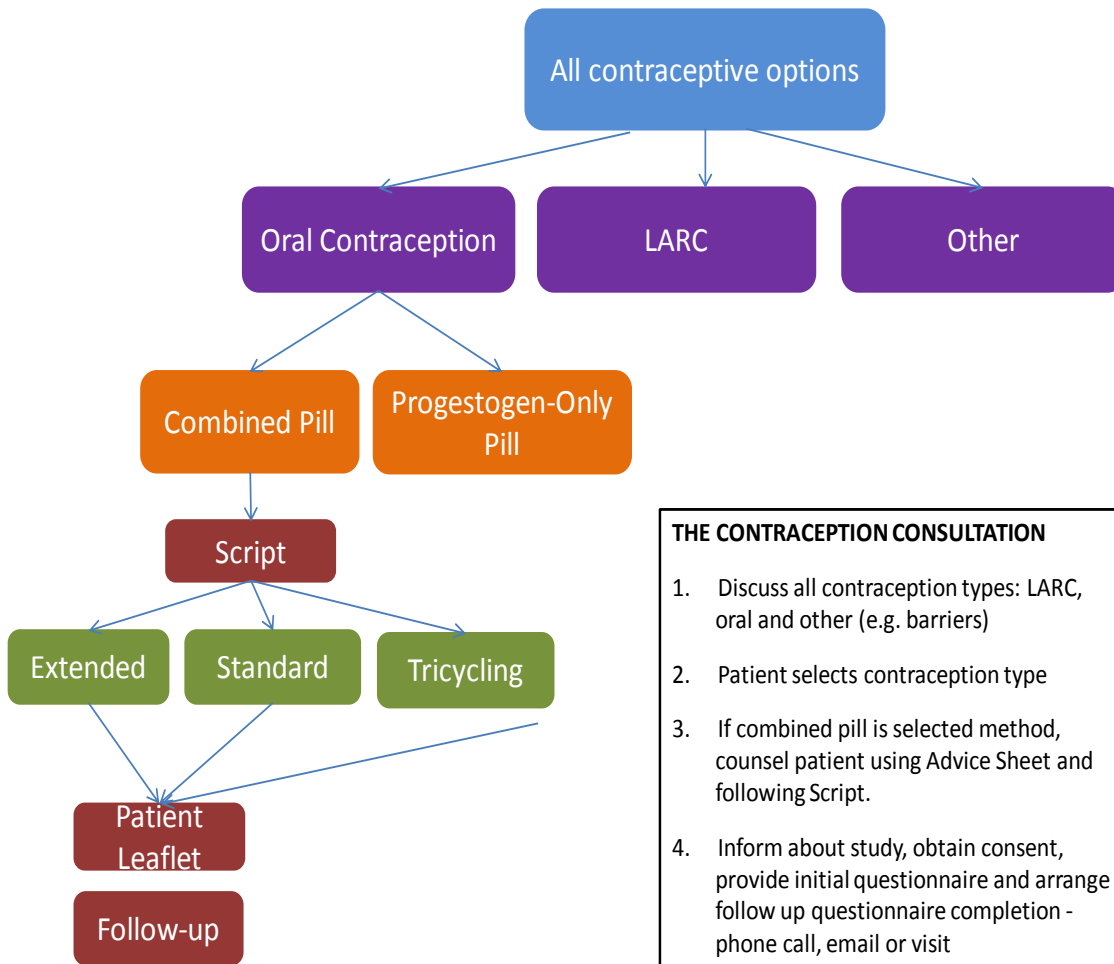

Supplement: inline-supplementary-material-2 [file inline-supplementary-material-2.pdf]
